# Supplementary material for: Identification of New Genes Involved in Germline Predisposition to Early-Onset Gastric Cancer
Source: Int J Mol Sci. 2021 Jan 28;22(3):1310. doi: 10.3390/ijms22031310 (PMC7866206; doi:10.3390/ijms22031310)
Supplement: Supplementary file 1 [file ijms-22-01310-s001.zip]

Archive with 5 entries (4 files):
- supp/
- supp/Supplementary Figure S1.pdf
- supp/Table S1-checked_27012021.DOCX
- supp/Table S2-checked_27012021.docx
- supp/Table S3-checked_27012021.docx
