# Supplementary figures and images for: Identification of New Genes Involved in Germline Predisposition to Early-Onset Gastric Cancer
Source: MDPI journal article supplement (doi:10.3390/ijms22031310), 2021-01-28

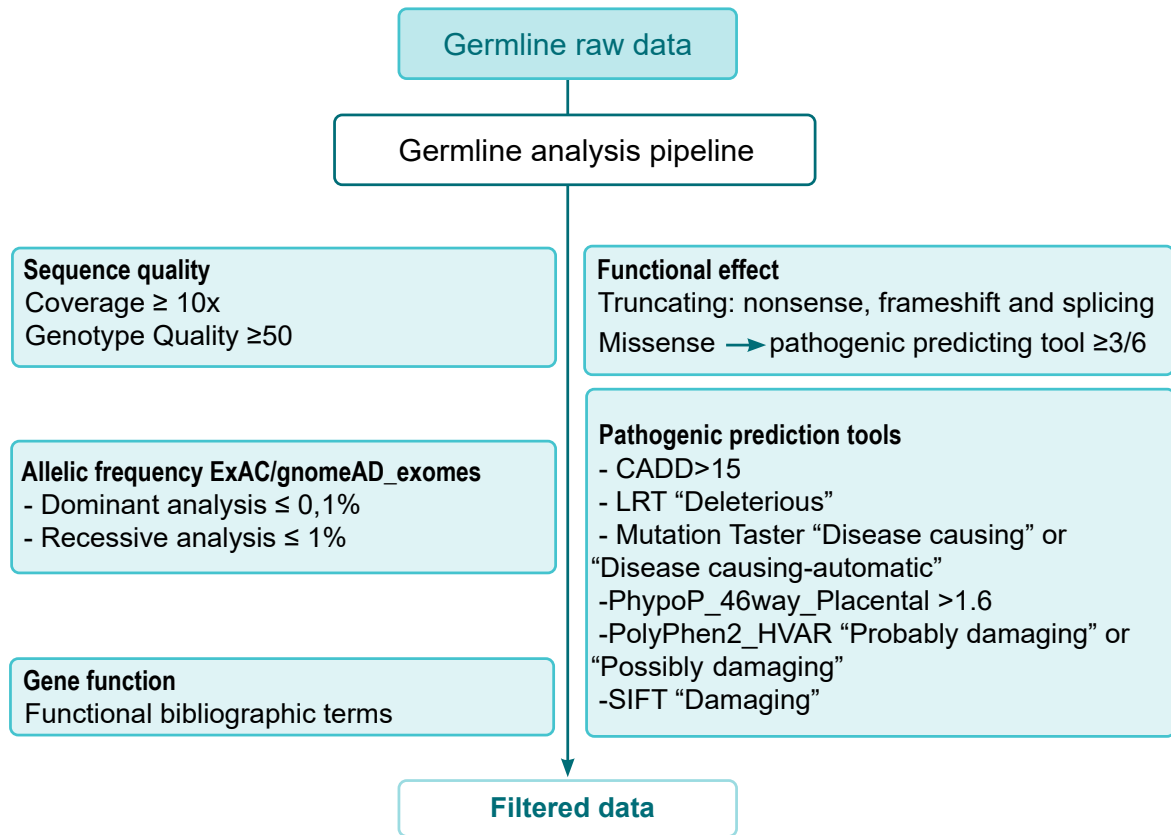

Supplement: s1 [file s1]
